# Supplementary material for: Understanding perceived exertion in power-aimed resistance training: the relationship between perceived exertion and muscle fatigue
Source: PeerJ. 2025 Nov 28;13:e20426. doi: 10.7717/peerj.20426 (PMC12667690; doi:10.7717/peerj.20426)
Supplement: Supplemental Information 1 — Peak RMS, MDF, and peak vertical velocity throughout lifting tasks. [file peerj-13-20426-s001.xlsx]

## Sheet: RMSmax-RPE
Subject 1	L	PM	%	AD	%	TRI	%		RPE		M	PM	%	AD	%	TRI	%		RPE		H	PM	%	AD	%	TRI	%		RPE
		0.637656	1	0.156937	1	0.340501	1		2			0.631356	1	0.132868	1	0.393084	1		2			0.483315	1	0.116015	1	0.369986	1		0.5
		0.699082	1.09633	0.192007	1.22347	0.452603	1.32923		3			0.856066	1.35592	0.183524	1.38125	0.405493	1.03157		3			0.452017	0.935243	0.21419	1.84623	0.322831	0.872551		2.5
		0.684675	1.07374	0.21124	1.34602	0.513512	1.50811		4			0.815165	1.29113	0.182169	1.37105	0.438282	1.11498		5			0.785884	1.62603	0.136343	1.17522	0.348767	0.942648		4
		0.871766	1.36714	0.175491	1.11823	0.471461	1.38461		5			0.889174	1.40836	0.234456	1.76457	0.513532	1.30642		6			0.628458	1.30031	0.164239	1.41567	0.395429	1.06877		5
		0.770984	1.20909	0.161576	1.02956	0.468836	1.3769		6			0.806719	1.27776	0.134709	1.01385	0.426529	1.08509		6			0.879464	1.81965	0.122619	1.05692	0.314826	0.850914		6
												0.681771	1.07985	0.191968	1.4448	0.437519	1.11304		7			0.795523	1.64597	0.124307	1.07147	0.398893	1.07813		6
												0.588082	0.931459	0.182841	1.37611	0.468275	1.19129		7			0.791335	1.63731	0.141148	1.21663	0.454326	1.22796		7
												0.880729	1.39498	0.149484	1.12505	0.486196	1.23688		7			0.801132	1.65758	0.134283	1.15746	0.375457	1.01479		7
												0.824321	1.30564	0.157691	1.18682	0.495015	1.25931		8			0.753794	1.55963	0.147272	1.26942	0.42389	1.14569		7
																						0.858409	1.77609	0.166669	1.43662	0.421308	1.13871		8
																						0.751628	1.55515	0.125819	1.0845	0.328677	0.888349		8
																						0.732947	1.5165	0.129669	1.11769	0.375836	1.01581		8
																						0.64399	1.33244	0.152862	1.31761	0.417384	1.12811		9
																						0.864767	1.78924	0.159682	1.37639	0.417458	1.12831		9
Subject 2	L	PM		AD		TRI			RPE		M	PM		AD		TRI			RPE		H	PM		AD		TRI			RPE
		0.141587	1	0.109262	1	0.357713	1		2			0.13727	1	0.150342	1	0.398703	1		2			0.0903549	1	0.0975364	1	0.486364	1		2
		0.130189	0.919499	0.0933277	0.854165	0.552214	1.54374		3			0.167516	1.22034	0.134635	0.895526	0.375394	0.941538		2.5			0.105313	1.16555	0.131998	1.35332	0.382862	0.787191		3
		0.12525	0.884611	0.151673	1.38817	0.42367	1.18439		3			0.141892	1.03367	0.131787	0.876581	0.493167	1.23693		3			0.0964426	1.06738	0.125114	1.28274	0.505199	1.03873		3
		0.132792	0.937882	0.100024	0.915451	0.41816	1.16898		4			0.188921	1.37628	0.178987	1.19053	0.363931	0.912789		4			0.115632	1.27976	0.108883	1.11633	0.406442	0.835676		4
												0.199949	1.45661	0.149062	0.991486	0.445448	1.11724		4			0.106092	1.17417	0.166515	1.70721	0.423626	0.871005		5
												0.200645	1.46169	0.158783	1.05615	0.420744	1.05528		5			0.146643	1.62297	0.118246	1.21233	0.399546	0.821497		5
												0.183459	1.33648	0.176248	1.17232	0.504998	1.2666		7			0.0997337	1.1038	0.166075	1.70269	0.479657	0.986209		6
												0.154496	1.12549	0.150389	1.00031	0.384434	0.964212		8			0.110568	1.2237	0.133007	1.36367	0.385657	0.792938		7
																						0.130426	1.44349	0.179996	1.84542	0.402511	0.827591		8
																						0.118599	1.31259	0.137989	1.41474	0.521446	1.07213		8
																						0.140563	1.55568	0.112037	1.14867	0.540829	1.11198		9
																						0.152876	1.69195	0.155981	1.5992	0.655514	1.34778		9
Subject 3	L	PM		AD		TRI			RPE		M	PM		AD		TRI			RPE		H	PM		AD		TRI			RPE
		0.471054	1	0.102379	1	0.231119	1		0.3			0.449041	1	0.134093	1	0.254131	1		0.3			0.541463	1	0.121829	1	0.406261	1		0.3
		0.577142	1.22521	0.140243	1.36985	0.322864	1.39696		0.5			0.437999	0.975408	0.174883	1.30419	0.247721	0.974779		0.5			0.534034	0.986279	0.173302	1.4225	0.365478	0.899614		0.5
		0.561737	1.19251	0.125497	1.22581	0.359271	1.55448		1			0.553791	1.23327	0.122636	0.914565	0.311774	1.22683		0.5			0.619031	1.14326	0.118322	0.971217	0.219734	0.540869		1
		0.732302	1.5546	0.113736	1.11093	0.384981	1.66572		1.5			0.510796	1.13753	0.149172	1.11245	0.288947	1.137		1.5			0.540523	0.998265	0.14774	1.21268	0.362115	0.891335		1
		0.732951	1.55598	0.161699	1.57942	0.310045	1.34149		2			0.494918	1.10217	0.089841	0.669991	0.353144	1.38962		1.5			0.483899	0.893688	0.131495	1.07934	0.263888	0.649554		1.5
												0.566562	1.26171	0.0917293	0.684074	0.225279	0.886467		2			0.622548	1.14975	0.169942	1.39492	0.237379	0.584302		2
												0.616303	1.37249	0.126179	0.940985	0.289738	1.14011		2.5			0.45321	0.837011	0.166834	1.36941	0.341854	0.841464		2.5
												0.645202	1.43684	0.143558	1.07059	0.192952	0.759262		3			0.680914	1.25755	0.155561	1.27688	0.338845	0.834057		3
												0.567292	1.26334	0.127554	0.951236	0.268971	1.0584		4			0.599349	1.10691	0.151607	1.24442	0.222933	0.548744		4
																						0.645186	1.19156	0.143339	1.17656	0.203457	0.500804		5
																						0.743461	1.37306	0.181976	1.4937	0.375876	0.925209		6
																						0.676333	1.24908	0.153897	1.26322	0.463914	1.14191		7
																						0.524248	0.968206	0.170682	1.40099	0.338542	0.833311		8
																						0.662457	1.22346	0.179726	1.47523	0.341702	0.841089		8
Subject 4	L	PM		AD		TRI			RPE		M	PM		AD		TRI			RPE		H	PM		AD		TRI			RPE
		0.406492	1	0.0711054	1	0.376097	1		2			0.336681	1	0.112203	1	0.361565	1		2			0.402439	1	0.0828201	1	0.384162	1		2
		0.432457	1.06388	0.0908042	1.27704	0.40792	1.08461		2.5			0.475752	1.41307	0.125284	1.11658	0.394621	1.09143		3			0.442814	1.10032	0.0911561	1.10065	0.431152	1.12232		2.5
		0.466169	1.14681	0.108373	1.52411	0.645987	1.71761		3			0.480653	1.42762	0.139826	1.24619	0.386973	1.07027		4			0.471582	1.17181	0.0925548	1.11754	0.494399	1.28696		3
												0.363199	1.07876	0.129723	1.15614	0.518112	1.43297		5			0.511672	1.27143	0.107784	1.30143	0.447036	1.16367		5
												0.549192	1.6312	0.112628	1.00379	0.423689	1.17182		5			0.367918	0.914219	0.0965627	1.16593	0.55495	1.44457		5
																						0.544293	1.35248	0.0947331	1.14384	0.473115	1.23155		6
																						0.553627	1.37568	0.138936	1.67756	0.621605	1.61808		7
																						0.54289	1.349	0.125318	1.51313	0.544614	1.41767		8
Subject 5	L	PM		AD		TRI			RPE		M	PM		AD		TRI			RPE		H	PM		AD		TRI			RPE
		0.0736413	1	0.183441	1	0.677392	1		1			0.0790744	1	0.178006	1	0.591354	1		1			0.115482	1	0.208856	1	0.61516	1		1
		0.0874002	1.18684	0.190781	1.04001	0.787223	1.16214		2			0.105492	1.33408	0.159077	0.893664	0.891173	1.507		2			0.107223	0.928486	0.318271	1.52388	0.737587	1.19901		2
		0.119512	1.62289	0.199239	1.08612	0.851717	1.25735		3			0.0848638	1.07321	0.204171	1.14699	0.669755	1.13258		3			0.112924	0.977846	0.205801	0.985371	0.739814	1.20264		3
												0.123643	1.56362	0.168633	0.947345	0.707242	1.19597		4			0.131532	1.13899	0.25146	1.20399	0.959324	1.55947		4
												0.1609	2.03479	0.305217	1.71464	0.729656	1.23387		5			0.128589	1.1135	0.207907	0.995453	0.995184	1.61776		5
												0.125123	1.58234	0.271334	1.52429	0.938858	1.58764		6			0.141003	1.221	0.268955	1.28775	0.779959	1.2679		6
																						0.139736	1.21002	0.251097	1.20225	0.932293	1.51553		7
																						0.145662	1.26134	0.348182	1.66709	1.01227	1.64554		8
																						0.185834	1.60921	0.361027	1.72859	0.770422	1.25239		9
Subject 6	L	PM		AD		TRI			RPE		M	PM		AD		TRI			RPE		H	PM		AD		TRI			RPE
		0.0714069	1	0.0734223	1	0.181633	1		5			0.0505524	1	0.0687582	1	0.154239	1		3			0.0830454	1	0.0627063	1	0.178249	1		5
		0.0623135	0.872654	0.0532786	0.725646	0.151485	0.834018		5			0.0702414	1.38948	0.0606471	0.882034	0.168104	1.08989		3			0.0703153	0.846709	0.0607997	0.969595	0.170439	0.956183		6
		0.0745065	1.04341	0.0719254	0.979612	0.1674	0.921636		5			0.0664854	1.31518	0.0711518	1.03481	0.174545	1.13165		4			0.0849751	1.02324	0.0696534	1.11079	0.17717	0.993942		6
		0.0765243	1.07166	0.0547957	0.746309	0.16798	0.92483		6			0.067024	1.32583	0.0682712	0.992916	0.196641	1.27491		4			0.0932488	1.12287	0.061733	0.984478	0.152687	0.85659		6
												0.0695568	1.37593	0.0766763	1.11516	0.170849	1.10768		4			0.0812029	0.977814	0.0527253	0.840829	0.227682	1.27732		6
												0.0715052	1.41448	0.0500394	0.727759	0.168743	1.09403		4			0.0879572	1.05915	0.0497515	0.793405	0.177765	0.997284		7
												0.0752462	1.48848	0.0533925	0.776525	0.156551	1.01499		5			0.105775	1.2737	0.0723722	1.15415	0.209863	1.17735		7
												0.0694146	1.37312	0.071373	1.03803	0.193113	1.25204		5			0.0811569	0.97726	0.063627	1.01468	0.212779	1.19372		7
																						0.0763591	0.919487	0.0597706	0.953184	0.191233	1.07284		8
																						0.0792269	0.954019	0.0536514	0.855598	0.207577	1.16453		8
																						0.088086	1.0607	0.062669	0.999405	0.170179	0.954725		8
																						0.0976067	1.17534	0.057124	0.910978	0.230955	1.29568		9
Subject 7	L	PM		AD		TRI			RPE		M	PM		AD		TRI			RPE		H	PM		AD		TRI			RPE
		0.11154	1	0.0286346	1	0.43195	1		1			0.192109	1	0.0235353	1	0.401294	1		1			0.0468274	1	0.0244784	1	0.504893	1		0
		0.149545	1.34073	0.0285148	0.995816	0.387425	0.896921		2			0.126155	0.656685	0.0210526	0.894512	0.272408	0.678826		2			0.0465887	0.994903	0.0179924	0.735031	0.375302	0.743329		2
		0.108241	0.970419	0.0321395	1.1224	0.32974	0.763374		2.5			0.143959	0.749361	0.0325821	1.38439	0.335115	0.835087		3			0.0545837	1.16564	0.0198694	0.811711	0.373023	0.738815		3
												0.1357	0.706372	0.0210414	0.894037	0.258239	0.643516		4			0.0511678	1.09269	0.0157145	0.641972	0.287578	0.569582		5
												0.148592	0.773477	0.0274146	1.16483	0.37303	0.92957		5			0.0478559	1.02196	0.0215463	0.880218	0.28029	0.555147		7
												0.199687	1.03945	0.0276996	1.17694	0.313752	0.781853		6			0.0449894	0.960748	0.0184733	0.754677	0.246845	0.488905		8
																						0.0487871	1.04185	0.0190593	0.778615	0.229638	0.454825		9
																						0.0511054	1.09136	0.022412	0.915581	0.176699	0.349973		9
																						0.0485791	1.03741	0.0301143	1.23024	0.241247	0.477818		9
Subject 8	L	PM		AD		TRI			RPE		M	PM		AD		TRI			RPE		H	PM		AD		TRI			RPE
		0.0554601	1	0.12895	1	0.243859	1		3			0.0781999	1	0.14252	1	0.212467	1		4			0.0628554	1	0.142371	1	0.172711	1		3
		0.0516329	0.930992	0.0956191	0.741518	0.140057	0.574336		3			0.0795404	1.01714	0.113044	0.793182	0.208855	0.983002		5			0.0636194	1.01216	0.137494	0.965748	0.174945	1.01294		5
		0.0614622	1.10822	0.109914	0.852375	0.16638	0.68228		4			0.0737709	0.943364	0.1135	0.796384	0.198434	0.933956		6			0.0952917	1.51605	0.10289	0.72269	0.163435	0.946292		5
												0.104327	1.3341	0.18	1.26298	0.220675	1.03863		6			0.0727447	1.15734	0.128018	0.899186	0.1835	1.06247		6
												0.136013	1.73929	0.212239	1.48919	0.226331	1.06525		6			0.0693913	1.10398	0.151322	1.06288	0.203746	1.1797		7
												0.133024	1.70107	0.294496	2.06635	0.272792	1.28393		7			0.086799	1.38093	0.146359	1.02802	0.218056	1.26255		7
																						0.127051	2.02133	0.148794	1.04511	0.213614	1.23683		8
																						0.109123	1.7361	0.169119	1.18787	0.259519	1.50262		8
																						0.116266	1.84974	0.177333	1.24557	0.22614	1.30936		8
Subject 9	L	PM		AD		TRI			RPE		M	PM		AD		TRI			RPE		H	PM		AD		TRI			RPE
		0.222521	1	0.24726	1	0.586876	1		1			0.27276	1	0.285188	1	0.457534	1		2			0.242541	1	0.24091	1	0.598133	1		1
		0.222305	0.999033	0.260693	1.05433	0.655164	1.11636		2			0.244761	0.89735	0.229833	0.8059	0.388637	0.849416		3			0.29225	1.20495	0.232404	0.964693	0.446039	0.745719		2
		0.282609	1.27003	0.236578	0.956798	0.569525	0.970436		3			0.258607	0.948114	0.256068	0.897893	0.413907	0.904647		4			0.251352	1.03633	0.218324	0.906249	0.541921	0.90602		3
												0.230533	0.845185	0.239961	0.841412	0.536117	1.17175		5			0.256426	1.05725	0.261548	1.08567	0.587698	0.982553		4
												0.226964	0.832102	0.194168	0.680842	0.459108	1.00344		6			0.289878	1.19518	0.255083	1.05883	0.523135	0.874612		5
												0.222251	0.814824	0.213185	0.747524	0.417623	0.912768		8			0.267651	1.10353	0.241668	1.00315	0.554252	0.926637		6
																						0.25324	1.04411	0.223365	0.927173	0.513553	0.858593		7
																						0.313825	1.29391	0.224884	0.933479	0.588325	0.983601		8
																						0.27796	1.14604	0.225517	0.936106	0.436001	0.728935		9
Subject 10	L	PM		AD		TRI			RPE		M	PM		AD		TRI			RPE		H	PM		AD		TRI			RPE
		0.175713	1	0.0570946	1	0.127174	1		1			0.148596	1	0.0596444	1	0.22886	1		1.5			0.187383	1	0.0560011	1	0.170309	1		1.5
		0.148821	0.846955	0.0727441	1.2741	0.153511	1.20709		1.5			0.19069	1.28327	0.0591681	0.992013	0.21538	0.941097		2.5			0.185233	0.988522	0.0622304	1.11124	0.192444	1.12997		2
		0.232696	1.32429	0.0938262	1.64335	0.163134	1.28276		2			0.200265	1.34771	0.0730106	1.2241	0.278561	1.21717		3			0.192271	1.02608	0.0708869	1.26581	0.186994	1.09797		3
		0.141084	0.802924	0.0907484	1.58944	0.170418	1.34004		2			0.144284	0.970977	0.119005	1.99524	0.264555	1.15597		4			0.207256	1.10605	0.0605938	1.08201	0.183059	1.07486		4
												0.17995	1.211	0.0623415	1.04522	0.260481	1.13817		5			0.214908	1.14689	0.109959	1.96352	0.205505	1.20666		5
												0.140661	0.9466	0.0759368	1.27316	0.30028	1.31207		6			0.172938	0.922909	0.0665116	1.18768	0.220042	1.29202		5
												0.139683	0.940013	0.0793196	1.32988	0.263866	1.15296		6			0.203245	1.08465	0.0809591	1.44567	0.225106	1.32175		6
																						0.197703	1.05507	0.0823736	1.47093	0.275336	1.61668		7
																						0.169556	0.904864	0.0876762	1.56562	0.207357	1.21753		8
																						0.178444	0.952292	0.0952249	1.70041	0.222452	1.30616		9
																						0.159977	0.853743	0.0977185	1.74494	0.227003	1.33289		9
Subject 11	L	PM		AD		TRI			RPE		M	PM		AD		TRI			RPE		H	PM		AD		TRI			RPE
		0.0915441	1	0.174561	1	0.447227	1		0			0.108718	1	0.138652	1	0.488826	1		0			0.0764685	1	0.139752	1	0.571885	1		0
		0.0901594	0.984873	0.159563	0.914084	0.499283	1.1164		1			0.120057	1.1043	0.146684	1.05793	0.475992	0.973745		0.5			0.0764104	0.99924	0.214461	1.53458	0.461131	0.806336		1
		0.0813635	0.88879	0.160485	0.919362	0.480204	1.07374		2			0.122292	1.12486	0.169101	1.21961	0.485283	0.992752		1.5			0.0784404	1.02579	0.179205	1.28231	0.480976	0.841037		1.5
		0.0920231	1.00523	0.174761	1.00115	0.406734	0.909458		3			0.105725	0.972468	0.152068	1.09676	0.418369	0.855863		2			0.0704419	0.921188	0.172375	1.23344	0.392591	0.686487		2
												0.141184	1.29862	0.140132	1.01068	0.431009	0.881723		3			0.0716239	0.936645	0.159967	1.14465	0.567841	0.99293		3
												0.122749	1.12906	0.15156	1.0931	0.434236	0.888323		5			0.0696854	0.911296	0.148898	1.06544	0.461993	0.807843		4
												0.128039	1.17772	0.144515	1.04229	0.468653	0.95873		6			0.0735609	0.961976	0.168395	1.20495	0.583985	1.02116		5
												0.125977	1.15875	0.153918	1.1101	0.507394	1.03798		7			0.0727515	0.951391	0.187174	1.33933	0.585461	1.02374		6
																						0.0718802	0.939998	0.153763	1.10026	0.5503	0.962256		7
																						0.0755147	0.987527	0.176059	1.2598	0.519665	0.908688		8
																						0.0633595	0.828569	0.220312	1.57645	0.568192	0.993543		9
																						0.0714539	0.934422	0.214552	1.53523	0.60179	1.05229		10
																						0.0626762	0.819634	0.178576	1.27781	0.510168	0.892082		10
Subject 12	L	PM		AD		TRI			RPE		M	PM		AD		TRI			RPE		H	PM		AD		TRI			RPE
		0.0559197	1	0.0442602	1	0.298696	1		2			0.0347399	1	0.0529598	1	0.354136	1		2			0.0465768	1	0.108129	1	0.283577	1		0.5
		0.0685626	1.22609	0.0589046	1.33087	0.393421	1.31713		2.5			0.0404599	1.16465	0.0541544	1.02256	0.397241	1.12172		3			0.0493846	1.06028	0.0870933	0.805455	0.405496	1.42993		1
		0.0622243	1.11274	0.0682108	1.54113	0.448268	1.50075		3			0.0404524	1.16444	0.047263	0.892431	0.344144	0.971785		3			0.0523606	1.12418	0.0910588	0.842129	0.294141	1.03725		1
		0.0654071	1.16966	0.0606602	1.37053	0.414265	1.38691		4			0.050295	1.44776	0.0634954	1.19894	0.401833	1.13469		4			0.0505469	1.08524	0.0956622	0.884703	0.423446	1.49323		2
		0.0678329	1.21304	0.0817307	1.8466	0.455867	1.52619		4			0.0490112	1.4108	0.0525569	0.992393	0.442615	1.24984		5			0.0760404	1.63258	0.107186	0.991276	0.374811	1.32172		3
												0.0721294	2.07627	0.0531533	1.00365	0.424487	1.19866		5			0.061352	1.31722	0.136647	1.26374	0.4279	1.50894		3
												0.0826734	2.37978	0.0834323	1.57539	0.408398	1.15322		6			0.0522027	1.12079	0.107763	0.996613	0.395378	1.39425		4
												0.0593566	1.7086	0.0654395	1.23564	0.429618	1.21314		6			0.0639507	1.37302	0.0753879	0.697201	0.533858	1.88258		4
												0.0671393	1.93263	0.0887696	1.67617	0.452192	1.27689		7			0.0843674	1.81136	0.0972556	0.899439	0.476168	1.67915		5
												0.0879873	2.53274	0.0740992	1.39916	0.502832	1.41989		7			0.0584933	1.25585	0.0886574	0.819921	0.477308	1.68317		6
																						0.0611283	1.31242	0.0911787	0.843238	0.442717	1.56119		6
																						0.0752085	1.61472	0.0905706	0.837614	0.527459	1.86002		7
																						0.0674125	1.44734	0.119193	1.10231	0.537104	1.89403		8
																						0.0548925	1.11153	0.130294	1.49603	0.423087	1.04338		9
Subject 13	L	PM		AD		TRI			RPE		M	PM		AD		TRI			RPE		H	PM		AD		TRI			RPE
		0.151731	1	0.106205	1	0.299259	1		2			0.174071	1	0.134102	1	0.324563	1		3			0.208028	1	0.0876095	1	0.29688	1		4
		0.166208	1.09541	0.119543	1.12559	0.302139	1.00962		2.5			0.200663	1.15276	0.111816	0.83381	0.29117	0.897114		3			0.203159	0.976592	0.0844286	0.963692	0.306388	1.03203		4
		0.179049	1.18004	0.122328	1.15181	0.28407	0.949243		2.5			0.189448	1.08834	0.13405	0.999605	0.469666	1.44707		3			0.208114	1.00041	0.0889907	1.01577	0.359876	1.21219		4
												0.185849	1.06766	0.116095	0.86572	0.312666	0.963344		4			0.208311	1.00136	0.0860876	0.982629	0.304652	1.02618		4
												0.217704	1.25066	0.11433	0.85256	0.478007	1.47277		4			0.253789	1.21997	0.0965432	1.10197	0.387391	1.30487		4
																						0.242317	1.16483	0.0850932	0.971278	0.466386	1.57096		5
																						0.228527	1.09854	0.088254	1.00736	0.399714	1.34638		5
																						0.239253	1.1501	0.0996481	1.13741	0.423491	1.42647		5
Subject 14	L	PM		AD		TRI			RPE		M	PM		AD		TRI			RPE		H	PM		AD		TRI			RPE
		0.166021	1	0.43645	1	0.142404	1		3			0.155302	1	0.537645	1	0.119601	1		3			0.136411	1	0.681047	1	0.162344	1		5
		0.132398	0.797479	0.645363	1.47867	0.147116	1.03309		3			0.186233	1.19917	0.491982	0.915069	0.124923	1.0445		3			0.162345	1.19012	0.624397	0.916819	0.145376	0.895481		3
		0.181718	1.09455	0.559164	1.28117	0.158343	1.11193		4			0.166239	1.07043	0.630318	1.17237	0.126494	1.05763		3			0.179272	1.31421	0.647423	0.950629	0.125734	0.774494		4
		0.166673	1.00392	0.59643	1.36655	0.131315	0.922129		4			0.175463	1.12982	0.562155	1.04559	0.169981	1.42123		4			0.137455	1.00765	0.582128	0.854754	0.145719	0.897592		4
												0.226625	1.45926	0.565578	1.05196	0.183178	1.53157		4			0.183972	1.34866	0.562491	0.825921	0.205472	1.26566		5
												0.178419	1.14885	0.56453	1.05001	0.187255	1.56566		4			0.199568	1.46299	0.616842	0.905726	0.187075	1.15234		5
												0.170177	1.09578	0.614094	1.14219	0.153968	1.28734		5			0.167367	1.22693	0.674449	0.990312	0.186123	1.14648		5
												0.199146	1.28231	0.713104	1.32635	0.169178	1.41452		5			0.208488	1.52838	0.587683	0.86291	0.198282	1.22137		6
																						0.188513	1.38195	0.635821	0.933594	0.152896	0.941806		6
																						0.192042	1.40782	0.685529	1.00658	0.191701	1.18083		6
																						0.199553	1.46288	0.692117	1.01625	0.185802	1.1445		7
																						0.189217	1.38711	0.759072	1.11457	0.172146	1.06038		5
Subject 15	L	PM		AD		TRI			RPE		M	PM		AD		TRI			RPE		H	PM		AD		TRI			RPE
		0.215113	1	0.147234	1	0.485711	1		5			0.295321	1	0.121185	1	0.414622	1		5			0.271325	1	0.167681	1	0.468689	1		5
		0.296559	1.37862	0.152238	1.03399	0.57979	1.19369		6			0.303899	1.02905	0.147217	1.21482	0.500482	1.20708		5			0.279827	1.03134	0.148894	0.88796	0.479187	1.0224		5
		0.289634	1.34643	0.146148	0.992625	0.535515	1.10254		6			0.338683	1.14683	0.162634	1.34203	0.470749	1.13537		5			0.302117	1.11349	0.178403	1.06395	0.509963	1.08806		6
		0.381016	1.77123	0.152119	1.03318	0.496845	1.02292		6			0.417444	1.41353	0.129982	1.07259	0.593867	1.43231		6			0.364074	1.34184	0.182462	1.08815	0.567812	1.21149		6
												0.399081	1.35135	0.132954	1.09712	0.535992	1.29273		6			0.355681	1.3109	0.170862	1.01897	0.644292	1.37467		6
												0.395617	1.33962	0.143973	1.18805	0.644351	1.55407		6			0.324492	1.19595	0.181568	1.08282	0.518597	1.10648		6
												0.342724	1.16051	0.234866	1.93808	0.499229	1.20406		7			0.341113	1.25721	0.184973	1.10312	0.648399	1.38343		7
												0.408912	1.38464	0.209289	1.72702	0.561745	1.35484		7			0.374724	1.38109	0.204056	1.21693	0.645095	1.37638		7
																						0.428955	1.58096	0.171339	1.02182	0.624734	1.33294		8
																						0.366464	1.35065	0.175687	1.04774	0.573442	1.2235		9
																						0.286946	1.05757	0.278287	1.65962	0.62631	1.3363		9
Subject 16	L	PM		AD		TRI			RPE		M	PM		AD		TRI			RPE		H	PM		AD		TRI			RPE
		0.262909	1	0.14475	1	0.297931	1		0.3			0.268959	1	0.147192	1	0.277318	1		0			0.215974	1	0.168469	1	0.178365	1		0
		0.241603	0.918959	0.139014	0.960374	0.311563	1.04575		0.5			0.24222	0.900584	0.141349	0.960306	0.318783	1.14952		0.3			0.234447	1.08553	0.165528	0.982542	0.154848	0.868152		0.3
		0.224541	0.854062	0.168846	1.16646	0.316763	1.06321		1			0.295945	1.10033	0.177957	1.20901	0.321071	1.15777		0.5			0.247107	1.14415	0.167239	0.992701	0.172177	0.965307		0.3
		0.319214	1.21416	0.215465	1.48853	0.262628	0.881506		1			0.347399	1.29164	0.169744	1.15322	0.262964	0.948239		1			0.262219	1.21412	0.216845	1.28715	0.17747	0.99498		1
												0.289013	1.07456	0.160358	1.08945	0.265252	0.956488		1			0.252185	1.16766	0.172447	1.02361	0.159026	0.891572		1
												0.323083	1.20123	0.154632	1.05054	0.341656	1.232		2			0.254637	1.17901	0.194843	1.15655	0.159179	0.892433		1.5
												0.400799	1.49018	0.148436	1.00845	0.280868	1.0128		2			0.337611	1.5632	0.191911	1.13915	0.15006	0.841305		2
																						0.327396	1.5159	0.182622	1.08401	0.157894	0.885227		2.5
																						0.306269	1.41808	0.185391	1.10044	0.142093	0.796639		3
																						0.363882	1.68484	0.182895	1.08563	0.129888	0.728215		4
																						0.299392	1.38624	0.246594	1.46373	0.127323	0.713831		6

## Sheet: MDF-RPE
Subject 1	L	PM	%	AD	%	TRI	%				M	PM	%	AD	%	TRI	%				H	PM	%	AD	%	TRI	%
		71.6511	1	116.822	1	88.785	1					75.5337	1	121.511	1	88.67	1					66.4207	1	127.306	1	97.786	1
		63.0631	0.880141	111.111	0.951111	99.0991	1.11617					77.1429	1.0213	112.857	0.928784	94.2857	1.06333					66.9782	1.00839	112.15	0.880943	91.9003	0.939811
		67.6923	0.944749	107.692	0.921846	81.5385	0.918381					59.97	0.793951	116.942	0.962397	89.955	1.01449					69.8052	1.05096	112.013	0.87987	87.6623	0.896471
		63.0631	0.880141	121.622	1.04108	91.5916	1.03161					63.8629	0.84549	104.361	0.858866	84.1121	0.948598					81.6	1.22853	123.2	0.967745	83.2	0.850838
		72.7969	1.01599	99.6169	0.85272	93.2312	1.05008					67.402	0.892343	112.745	0.927862	84.5588	0.953636					71.066	1.06994	125.212	0.983545	87.9865	0.899786
												62.8655	0.832285	102.339	0.842224	93.5673	1.05523					59.97	0.902882	112.444	0.883254	79.4603	0.812594
												64.4217	0.852887	98.0966	0.807309	102.489	1.15585					59.2486	0.89202	105.491	0.828642	78.0347	0.798015
												62.7615	0.830908	103.208	0.849372	86.4714	0.975205					62.8655	0.946475	111.111	0.872786	81.8713	0.83725
												58.75	0.777799	103.75	0.853834	83.75	0.944514					68.1199	1.02558	108.992	0.856139	84.4687	0.863812
																						51.8417	0.780506	109.141	0.857307	88.6767	0.906844
																						58.6667	0.883259	109.333	0.858821	80	0.818113
																						59.9548	0.902652	104.072	0.817496	83.7104	0.856057
																						50.1636	0.755241	107.961	0.848039	81.7884	0.836403
																						49.4737	0.744854	106.316	0.835118	69.4737	0.710467
Subject 2	L	PM		AD		TRI					M	PM		AD		TRI					H	PM		AD		TRI
		104.52	1	107.345	1	135.593	1					87.1212	1	98.4848	1	126.263	1					93.0233	1	102.815	1	124.847	1
		106.003	1.01419	99.6169	0.92801	132.822	0.979566					95.7576	1.09913	96.9697	0.984615	126.061	0.9984					92.2266	0.991436	101.449	0.986715	122.53	0.981438
		104.513	0.999936	99.7625	0.929366	121.14	0.893409					110.968	1.27372	91.6129	0.930223	117.419	0.929961					92.1717	0.990846	99.7475	0.970163	130.051	1.04168
		99.7625	0.954484	103.325	0.962558	131.829	0.972239					95	1.09043	97.5	0.99	128.75	1.0197					98.0645	1.05419	99.3548	0.966344	123.871	0.992182
												101.333	1.16313	93.3333	0.947692	110.667	0.87648					103.75	1.11531	95	0.923988	128.75	1.03126
												73.6342	0.845193	91.4489	0.928558	116.39	0.921805					79.6767	0.856524	85.4503	0.831106	128.176	1.02666
												83.5073	0.958519	91.858	0.932712	113.779	0.901127					96.9697	1.04242	94.5455	0.919567	120	0.961176
												101.176	1.16133	81.1765	0.824253	103.529	0.819953					90.3465	0.971225	75.495	0.734279	122.525	0.981399
																						91.9283	0.988229	84.0807	0.817785	114.35	0.915919
																						90.2978	0.970701	84.5341	0.822195	118.156	0.946403
																						82.879	0.890949	81.7884	0.79549	111.232	0.890949
																						89.8251	0.96562	67.5676	0.657175	112.878	0.904127
Subject 3	L	PM		AD		TRI					M	PM		AD		TRI					H	PM		AD		TRI
		78.4615	1	113.846	1	130.769	1					83.3333	1	121.469	1	145.48	1					91.1854	1	106.383	1	126.14	1
		77.961	0.993621	103.448	0.908667	130.435	0.997442					86.3836	1.0366	108.346	0.891961	128.843	0.885642					82.5545	0.905348	101.246	0.951713	124.611	0.987877
		68.1481	0.868555	106.667	0.936937	130.37	0.99695					75.9878	0.911854	98.7842	0.813247	124.62	0.856612					76.4431	0.838326	102.964	0.967863	135.725	1.07599
		65.7143	0.837535	107.143	0.94112	115.714	0.884874					60.6936	0.728324	109.827	0.904154	115.607	0.794657					79.0274	0.866667	106.383	1	124.62	0.987952
		67.7966	0.864074	101.695	0.893266	115.819	0.885676					78.5185	0.942222	114.074	0.939121	117.037	0.804488					79.063	0.867057	111.274	1.04597	114.202	0.905361
												73.1034	0.877241	103.448	0.851644	111.724	0.767968					70.3448	0.771448	99.3103	0.933517	102.069	0.809173
												66.6667	0.8	108.148	0.890336	111.111	0.763754					68.5714	0.752	105.714	0.993714	115.714	0.917349
												68.0174	0.816208	88.2779	0.726753	102.75	0.706279					62.8571	0.689333	95.7143	0.899714	111.429	0.883373
												62.1469	0.745763	87.5706	0.72093	107.345	0.737864					71.25	0.781375	93.75	0.88125	92.5	0.733313
																						74.8387	0.820731	86.4516	0.812645	105.806	0.838803
																						60.5096	0.663588	80.6794	0.758386	108.28	0.858415
																						59.4406	0.651865	81.5851	0.7669	103.73	0.822338
																						63.7838	0.699495	76.7568	0.721514	91.8919	0.728492
																						58.3784	0.640216	76.7568	0.721514	98.3784	0.779915
Subject 4	L	PM		AD		TRI					M	PM		AD		TRI					H	PM		AD		TRI
		70.9914	1	129.743	1	93.0233	1					65.0289	1	132.948	1	88.1503	1					71.1462	1	137.022	1	86.9565	1
		67.1429	0.945788	141.429	1.09007	84.2857	0.906071					54.2857	0.834794	115.714	0.870373	90	1.02098					61.4035	0.86306	131.579	0.960273	93.5673	1.07602
		63.6758	0.896951	115.774	0.892335	88.2779	0.948987					69.1114	1.06278	129.76	0.976023	93.0889	1.05602					56.3584	0.792148	111.272	0.812069	86.7052	0.99711
												67.4764	1.03764	110.661	0.832365	79.6221	0.903254					71.525	1.00532	117.409	0.856859	78.2726	0.900135
												52.2565	0.803589	108.076	0.81292	89.0736	1.01047					63.75	0.896042	120	0.875769	77.5	0.89125
																						57.9515	0.81454	118.598	0.86554	82.2102	0.945418
																						54.2929	0.763117	102.273	0.746394	65.6566	0.755051
																						51.25	0.720347	97.5	0.711563	73.75	0.848125
Subject 5	L	PM		AD		TRI					M	PM		AD		TRI					H	PM		AD		TRI
		53.7143	1	99.4286	1	83.4286	1					47.1092	1	111.349	1	84.5824	1					54.4444	1	108.889	1	83.3333	1
		53.9648	1.00466	100.22	1.00796	81.4978	0.976857					47.4074	1.00633	94.0741	0.844858	92.5926	1.0947					50.7185	0.931565	104.818	0.962617	80.3043	0.963652
		48.8842	0.910078	100.956	1.01537	78.6397	0.9426					58.2857	1.23725	109.714	0.985319	78.8571	0.932311					53.9535	0.990982	104.186	0.956811	88.3721	1.06047
												44.7598	0.950129	101.528	0.911803	84.0611	0.993837					47.2727	0.868275	108.182	0.993506	70	0.84
												46.6667	0.990606	91.4286	0.821099	76.1905	0.900784					46.0653	0.846097	100.768	0.925418	80.6142	0.96737
												39.4737	0.837919	101.151	0.908417	79.7697	0.9431					41.6327	0.764681	98.7755	0.907122	71.0204	0.852245
																						42.4188	0.77912	97.4729	0.89516	65.8845	0.790614
																						44.1176	0.810324	94.4272	0.867189	68.1115	0.817337
																						39.4265	0.724161	94.086	0.864055	60.0358	0.72043
Subject 6	L	PM		AD		TRI					M	PM		AD		TRI					H	PM		AD		TRI
		93.3333	1	124	1	166.667	1					94.697	1	109.848	1	171.717	1					97.2079	1	115.822	1	164.426	1
		85.5107	0.916186	111.639	0.900314	159.145	0.954869					92.5	0.9768	121.25	1.10379	165	0.960882					84.4444	0.8687	114.444	0.988105	172.222	1.04741
		79.1826	0.848385	107.28	0.865159	171.137	1.02682					91.471	0.965933	103.832	0.945228	160.692	0.935796					93.3333	0.960142	109.333	0.943976	158.667	0.964973
		92.4548	0.990588	107.333	0.865586	168.969	1.01382					83.8052	0.884983	110.985	1.01035	155.153	0.903537					78.0543	0.802963	98.4163	0.849719	162.896	0.990694
												93.75	0.99	98.75	0.898966	153.75	0.895368					75.2381	0.773992	110.476	0.953844	153.333	0.932537
												82.5083	0.871287	117.712	1.07158	155.116	0.90332					75.4286	0.775951	107.429	0.927531	157.714	0.959181
												81.2121	0.8576	105.455	0.96	144.242	0.84					83.6013	0.860026	107.181	0.925394	151.125	0.919109
												78	0.82368	102	0.928552	150	0.873529					79.2952	0.815728	103.524	0.893821	154.185	0.937716
																						74.5501	0.766915	105.398	0.910003	146.53	0.891158
																						77.4947	0.797206	107.219	0.925718	140.127	0.852221
																						65.6045	0.674889	101.218	0.873912	158.388	0.963278
																						68.1818	0.701402	106.534	0.919808	144.176	0.876845
Subject 7	L	PM		AD		TRI					M	PM		AD		TRI					H	PM		AD		TRI
		41.9048	1	62.8571	1	56.1905	1					43.1235	1	69.9301	1	55.9441	1					41.0628	1	63.6071	1	45.8937	1
		42.2265	1.00768	58.5413	0.931338	51.8234	0.922281					44.2913	1.02708	67.9134	0.971161	63.9764	1.14358					40.5101	0.986541	67.5169	1.06147	46.5116	1.01346
		43.3468	1.03441	67.5403	1.07451	45.3629	0.807306					37.9523	0.880084	65.3133	0.933981	55.6046	0.993932					41.2371	1.00424	64.8012	1.01877	48.6009	1.05899
												41.6263	0.965281	64.8596	0.927493	52.2749	0.934414					38.6196	0.9405	67.3788	1.0593	46.8365	1.02054
												41.6667	0.966216	57.5397	0.822817	46.627	0.833457					42.8986	1.04471	67.2464	1.05722	45.7971	0.997895
												40	0.927568	64.3478	0.920174	42.6087	0.76163					38.4615	0.936652	70.2918	1.10509	52.3873	1.14149
																						38.1651	0.929433	65.6881	1.03272	52.4771	1.14345
																						38.9436	0.948391	61.7726	0.971159	48.7914	1.06314
																						39.0789	0.951685	67.6902	1.06419	44.6615	0.973152
Subject 8	L	PM		AD		TRI					M	PM		AD		TRI					H	PM		AD		TRI
		55.0542	1	101.986	1	155.235	1					50.4775	1	90.0409	1	141.883	1					52.3077	1	103.077	1	147.692	1
		58.0645	1.05468	96.7742	0.948901	138.065	0.889392					51.4286	1.01884	95.7143	1.06301	137.143	0.966593					51.6129	0.986717	109.677	1.06403	138.065	0.934812
		58.5366	1.06325	106.341	1.04271	139.512	0.898718					50.6667	1.00375	93.3333	1.03657	137.333	0.967936					51.4286	0.983193	98.2857	0.953518	124.571	0.843452
												50.8475	1.00733	83.3333	0.925505	129.944	0.915852					49.952	0.954964	97.0221	0.941259	139.289	0.943104
												42.2078	0.836171	87.6623	0.973583	135.281	0.953474					48.75	0.931985	93.75	0.909515	118.75	0.804036
												43.7209	0.866147	83.7209	0.92981	125.581	0.885107					44.2375	0.845717	84.9825	0.824457	116.414	0.788223
																						45.8824	0.877163	91.7647	0.890255	111.765	0.75674
																						40	0.764706	76.8421	0.745483	118.947	0.805373
																						40	0.764706	81.1111	0.786899	113.333	0.767361
Subject 9	L	PM		AD		TRI					M	PM		AD		TRI					H	PM		AD		TRI
		126.173	1	160.584	1	104.275	1					109.557	1	128.205	1	97.9021	1					113.126	1	145.941	1	102.763	1
		141.33	1.12013	115.202	0.717394	92.6366	0.888385					122.081	1.11431	134.82	1.05159	89.172	0.910828					129.332	1.14326	136.94	0.938322	114.117	1.11048
		130.797	1.03664	123.662	0.770079	91.5577	0.878038					110.59	1.00943	119.025	0.928397	97.4695	0.995582					132.55	1.1717	118.289	0.810522	89.7651	0.873512
												122.76	1.12051	110.215	0.859677	88.7097	0.906106					117.209	1.03609	113.488	0.77763	96.7442	0.941427
												120.036	1.09565	112.816	0.879964	96.5704	0.986398					109.152	0.96487	135.181	0.926267	90.6801	0.882416
												123.077	1.1234	128.205	1	84.1026	0.859048					112.156	0.991427	108.538	0.743712	88.2779	0.85904
																						107.89	0.953719	111.916	0.766858	86.9565	0.846182
																						99.1501	0.876457	101.983	0.698795	84.0415	0.817816
																						91.6442	0.810107	107.143	0.73415	86.2534	0.83934
Subject 10	L	PM		AD		TRI					M	PM		AD		TRI					H	PM		AD		TRI
		68.75	1	97.5	1	122.5	1					79.096	1	96.0452	1	103.107	1					72.3056	1	92.7694	1	120.055	1
		71.7241	1.04326	104.828	1.07515	113.103	0.923293					77.7626	0.983142	96.8622	1.00851	105.048	1.01882					76.4163	1.05685	97.4967	1.05096	105.402	0.877949
		68.2128	0.992187	88.6767	0.909504	103.683	0.846396					73.107	0.924282	95.3003	0.992244	104.439	1.01291					69.9208	0.967018	97.6253	1.05234	108.179	0.901085
		73.1429	1.0639	96	0.984615	107.429	0.876968					77.9703	0.985767	85.396	0.889123	95.297	0.924251					70.9677	0.981497	83.871	0.90408	109.677	0.913563
												73.75	0.932411	87.5	0.911029	98.75	0.95774					67.8733	0.938701	88.2353	0.951125	109.729	0.913989
												70.5446	0.891885	85.396	0.889123	99.0099	0.96026					77.1971	1.06765	95.0119	1.02417	108.076	0.900224
												71.0988	0.898892	91.4127	0.951768	92.3361	0.895534					66.8973	0.925203	95.7324	1.03194	96.8858	0.807015
																						64.2105	0.888044	83.1579	0.896393	94.7368	0.789115
																						71.6279	0.990627	80	0.862353	94.8837	0.790338
																						64.3402	0.889838	77.4264	0.834611	91.6031	0.763012
																						65.3433	0.90371	81.0587	0.873765	90.1572	0.750968
Subject 11	L	PM		AD		TRI					M	PM		AD		TRI					H	PM		AD		TRI
		106.419	1	134.291	1	108.108	1					92.0314	1	124.579	1	113.356	1					106.412	1	118.69	1	114.598	1
		106.667	1.00233	117.949	0.87831	110.769	1.02462					101.218	1.09982	119.025	0.955419	119.963	1.05828					110.128	1.03492	123.894	1.04384	110.128	0.960996
		109.333	1.02739	113.333	0.843941	105.333	0.974333					105	1.14091	126.25	1.01341	100	0.882178					118.799	1.11641	113.577	0.956919	114.883	1.00249
		98.8484	0.928861	118.042	0.879006	112.284	1.03863					103.415	1.12369	120	0.963243	95.6098	0.843448					116.123	1.09126	144.914	1.22094	103.647	0.904442
												96.4765	1.0483	134.228	1.07745	100.671	0.888099					116.129	1.09132	118.71	1.00016	109.677	0.957066
												86.6935	0.941999	117.944	0.946736	111.895	0.987115					108.559	1.02018	129.436	1.09054	103.34	0.901767
												98.8889	1.07451	106.667	0.856216	96.6667	0.852772					119.026	1.11854	123.535	1.04082	99.1885	0.865537
												92.093	1.00067	118.14	0.948309	105.116	0.927313					101.176	0.950799	112.941	0.951562	103.529	0.903417
																						102.349	0.961818	127.517	1.07437	88.9262	0.775987
																						104.626	0.983212	103.524	0.872221	101.322	0.884151
																						105.398	0.990475	107.112	0.902452	90.8312	0.79261
																						103.001	0.967944	98.1346	0.826812	93.2685	0.813878
																						96.7492	0.909195	109.133	0.919478	96.7492	0.844252
Subject 12	L	PM		AD		TRI					M	PM		AD		TRI					H	PM		AD		TRI
		42.963	1	85.9259	1	80	1					35.1515	1	92.1212	1	78.7879	1					37.8788	1	87.1212	1	88.3838	1
		37.6007	0.875189	78.7825	0.916865	95.7923	1.1974					42.8397	1.21871	93.0233	1.00979	85.6793	1.08747					42.9293	1.13333	87.1212	1	83.3333	0.942857
		36.3881	0.846965	74.124	0.86265	86.2534	1.07817					41.4395	1.17888	90.5125	0.982537	86.1505	1.09345					45.9184	1.21224	79.0816	0.90772	77.8061	0.880321
		37.8096	0.880052	70.4042	0.819359	80.8344	1.01043					33.7395	0.959829	81.537	0.885106	87.1603	1.10626					45.3216	1.19649	78.9474	0.906178	90.6433	1.02556
		43.6562	1.01614	70.9413	0.82561	83.2196	1.04025					42.7252	1.21546	69.2841	0.752097	81.9861	1.04059					35.4906	0.936952	79.3319	0.910593	83.5073	0.944826
												45.6323	1.29816	92.5684	1.00485	79.5306	1.00943					42.3814	1.11887	74.672	0.857105	80.7265	0.913363
												41.2979	1.17486	78.6627	0.853905	77.6794	0.985931					45.3431	1.19706	67.402	0.773657	77.2059	0.873529
												37.6471	1.07099	75.2941	0.817337	74.1176	0.940724					33.2522	0.877859	68.9376	0.791283	82.7251	0.935975
												43.3333	1.23276	80	0.868421	70.8333	0.899038					34.9091	0.9216	72	0.826435	78.5455	0.888686
												38.7812	1.10326	74.7922	0.811889	71.0988	0.902408					44.9827	1.18754	73.8178	0.8473	74.9712	0.848245
																						30	0.792	66.25	0.760435	77.5	0.876857
																						37.2149	0.982473	64.8259	0.744089	74.4298	0.84212
																						35.0877	0.926316	66.482	0.763098	68.3287	0.773091
																						36.6667	0.854118	62.2222	0.714203	67.7778	0.813333
Subject 13	L	PM		AD		TRI					M	PM		AD		TRI					H	PM		AD		TRI
		68.2657	1	167.897	1	78.4133	1					64.2105	1	180	1	83.1579	1					47.5676	1	176.216	1	88.6486	1
		57.8778	0.847832	175.777	1.04694	86.8167	1.10717					49.5963	0.772402	178.777	0.993208	88.812	1.06799					52.1212	1.09573	156.364	0.88734	88.4848	0.998152
		54.7368	0.801821	167.368	0.996854	78.9474	1.00681					53.4351	0.832186	162.486	0.902702	79.6074	0.957304					44.8485	0.942837	164.848	0.93549	87.2727	0.984479
												61.7577	0.961801	156.77	0.870942	87.886	1.05686					51.8919	1.09091	162.162	0.920245	80	0.902439
												58.8889	0.917122	166.667	0.925926	78.8889	0.948664					43.943	0.923802	146.081	0.828986	80.7601	0.911013
																						56.1905	1.18128	154.286	0.875548	82.8571	0.934669
																						51.2821	1.07809	155.897	0.884694	83.0769	0.937148
																						46.0653	0.968417	151.631	0.860485	72.9367	0.822761
Subject 14	L	PM		AD		TRI					M	PM		AD		TRI					H	PM		AD		TRI
		71.1111	1	78.5185	1	96.2963	1					70.3448	1	82.7586	1	102.069	1					66.474	1	70.8092	1	79.4798	1
		67.9191	0.955112	78.0347	0.993838	88.1503	0.915407					68.9655	0.980392	73.4633	0.887681	95.952	0.940071					60.7815	0.914365	78.1476	1.10364	85.3835	1.07428
		63.5593	0.893803	76.2712	0.971378	93.2203	0.968057					70	0.995098	78.5714	0.949405	101.429	0.993726					67.1429	1.01006	67.1429	0.948222	84.2857	1.06047
		82.2873	1.15717	69.735	0.888135	94.8396	0.984873					76.0234	1.08072	71.6374	0.865619	86.2573	0.845089					74.8588	1.12614	67.7966	0.957454	84.7458	1.06626
												65.6425	0.933153	72.6257	0.877561	81.0056	0.793636					57.101	0.858998	76.1347	1.07521	79.063	0.994756
												70	0.995098	74.2857	0.897619	81.4286	0.79778					61.4693	0.924712	73.4633	1.03748	77.961	0.980891
												62.8571	0.893557	71.4286	0.863095	85.7143	0.839768					64.1562	0.965132	68.3403	0.965132	76.7085	0.965132
												60.6061	0.861557	73.2323	0.884891	80.8081	0.791701					59.9739	0.902216	65.189	0.920629	74.3155	0.935024
																						64.8276	0.975232	67.5862	0.954483	68.9655	0.867712
																						63.7755	0.959406	65.051	0.91868	73.9796	0.930798
																						58.1818	0.875257	65.4545	0.924378	75.1515	0.945543
																						55.2604	0.831308	61.6366	0.870459	69.0755	0.869095
Subject 15	L	PM		AD		TRI					M	PM		AD		TRI					H	PM		AD		TRI
		64.0279	1	96.624	1	79.1618	1					59.417	1	90.8072	1	80.7175	1					60.0437	1	103.712	1	85.1528	1
		58.1948	0.908897	90.2613	0.93415	74.8219	0.945176					67.5403	1.13672	96.7742	1.06571	77.621	0.961638					66.5213	1.10788	95.9651	0.925306	73.0643	0.858038
		62.7063	0.979358	91.3091	0.944994	79.2079	1.00058					62.3529	1.04941	89.4118	0.984633	77.6471	0.961961					56.2633	0.937039	88.1104	0.84957	72.1868	0.847733
		57.9111	0.904466	92.0372	0.95253	73.423	0.927505					62.7027	1.0553	91.8919	1.01195	81.0811	1.0045					57.7972	0.962586	91.6031	0.883246	71.9738	0.845231
												60	1.00981	90	0.991111	77	0.953944					66.7491	1.11168	88.9988	0.858135	76.6378	0.900003
												50.9554	0.857589	97.6645	1.07552	67.9406	0.841708					62.1592	1.03523	89.422	0.862217	68.7023	0.806812
												61.9555	1.04272	87.1249	0.959449	63.8916	0.791546					62.1118	1.03444	90.0621	0.868388	64.1822	0.753729
												58.7762	0.989214	85.3462	0.939862	71.6586	0.887771					59.0476	0.983411	82.8571	0.798917	71.4286	0.838828
																						59.5122	0.991149	80.9756	0.780775	74.1463	0.870744
																						65.0888	1.08402	77.7684	0.749851	73.5418	0.863645
																						57.35	0.955139	85.0363	0.819929	59.9868	0.704461
Subject 16	L	PM		AD		TRI					M	PM		AD		TRI					H	PM		AD		TRI
		65.8199	1	112.009	1	166.282	1					66.8317	1	111.386	1	154.703	1					65.7143	1	113.333	1	153.333	1
		65.3805	0.993325	99.6785	0.889913	138.264	0.831502					72.2222	1.08066	105.556	0.947654	141.111	0.912142					64.1822	0.976686	102.484	0.904275	141.822	0.924926
		66.0377	1.00331	101.201	0.903503	125.214	0.753026					69.5238	1.04028	97.1429	0.872127	139.048	0.898804					64.8247	0.986462	98.831	0.872039	134.963	0.880192
		64.3902	0.97828	95.6098	0.853588	118.049	0.709932					64.3902	0.963469	88.7805	0.797051	131.707	0.851356					62.9302	0.957633	81.6126	0.720111	125.86	0.820829
												65.762	0.983994	94.9896	0.852795	129.436	0.836676					62.8627	0.956606	85.1064	0.750939	131.528	0.857792
												61.6302	0.922171	88.1378	0.791282	121.272	0.783905					59.126	0.899743	87.4036	0.771208	117.395	0.76562
												61.2076	0.915847	94.2928	0.84654	119.107	0.769906					62.6679	0.953641	87.735	0.774132	119.964	0.782375
																						54.5455	0.83004	85.0909	0.750802	109.091	0.711462
																						53.8462	0.819398	81.5385	0.719457	114.615	0.747492
																						54.2222	0.825121	73.7778	0.65098	104.889	0.684058
																						48.4454	0.737213	65.799	0.580579	100.506	0.655475

## Sheet: Velocity-RPE
Subject 1	L		VR_max			Velocity Loss(%)		M		VR_max			Velocity Loss(%)		H		VR_max			Velocity Loss(%)
			98.388			0.0396111				108.186			0				88.274			0.148567
			85.833			0.162163				80.313			0.25764				95.889			0.0751179
			98.238			0.0410753				87.371			0.1924				103.677			0
			102.446			0				86.597			0.199554				94.8			0.0856217
			87.73			0.143646				84.438			0.219511				87.475			0.156274
										85.86			0.206367				96.824			0.0660995
										77.967			0.279324				93.977			0.0935598
										83.984			0.223707				93.479			0.0983632
										67.504			0.376038				77.751			0.250065
																	73.94			0.286823
																	86.05			0.170018
																	63.451			0.387993
																	60.906			0.412541
																	69.083			0.333671
Subject 2	L		VR_max			Velocity Loss(%)		M		VR_max			Velocity Loss(%)		H		VR_max			Velocity Loss(%)
			67.717			0				66.48			0.10241				50.336			0.237599
			62.489			0.0772037				72.89			0.0158644				64.278			0.0264302
			55.73			0.177016				74.065			0				53.093			0.195841
			54.536			0.194648				65.694			0.113022				66.023			0
										65.683			0.113171				62.408			0.0547536
										63.137			0.147546				56.494			0.144328
										57.464			0.224141				55.144			0.164776
										62.923			0.150435				57.744			0.125396
																	48.197			0.269997
																	40.79			0.382185
																	42.797			0.351786
																	40.694			0.383639
Subject 3	L		VR_max			Velocity Loss(%)		M		VR_max			Velocity Loss(%)		H		VR_max			Velocity Loss(%)
			72.428			0.049102				79.97			0.00816094				90.048			0
			76.168			0				74.537			0.0755445				83.141			0.0767035
			67.495			0.113867				80.628			0				84.603			0.0604678
			66.427			0.127888				66.878			0.170536				71.539			0.205546
			67.901			0.108536				71.774			0.109813				72.494			0.19494
										67.165			0.166977				71.767			0.203014
										71.301			0.115679				68.9			0.234853
										62.925			0.219564				67.499			0.250411
										62.435			0.225641				61.166			0.32074
																	58.367			0.351823
																	56.974			0.367293
																	54.651			0.39309
																	45.894			0.490338
																	51.157			0.431892
Subject 4	L		VR_max			Velocity Loss(%)		M		VR_max			Velocity Loss(%)		H		VR_max			Velocity Loss(%)
			67.862			0				75.518			0.118656				69.598			0.0346616
			67.447			0.00611535				85.685			0				70.973			0.0155901
			63.907			0.05828				67.285			0.21474				68.657			0.0477135
										66.643			0.222233				72.097			0
										70.473			0.177534				63.236			0.122904
																	58.206			0.192671
																	53.993			0.251106
																	56.692			0.21367
Subject 5	L		VR_max			Velocity Loss(%)		M		VR_max			Velocity Loss(%)		H		VR_max			Velocity Loss(%)
			61.309			0				71.246			0				76.306			0
			61.115			0.0031643				48.593			0.317955				46.477			0.390913
			59.207			0.0342853				61.242			0.140415				49.502			0.35127
										62.863			0.117663				56.995			0.253073
										42.923			0.397538				50.702			0.335544
										49.641			0.303245				52.102			0.317197
																	57.039			0.252497
																	46.249			0.393901
																	49.165			0.355686
Subject 6	L		VR_max			Velocity Loss(%)		M		VR_max			Velocity Loss(%)		H		VR_max			Velocity Loss(%)
			72.794			0.0305766				75.855			0.0199992				86.67			0
			75.09			0				77.403			0				71.154			0.179024
			66.271			0.117446				60.497			0.218415				69.277			0.200681
			73.213			0.0249967				75.989			0.018268				65.043			0.249533
										72.514			0.0631629				64.118			0.260205
										70.963			0.0832009				60.112			0.306427
										70.344			0.091198				59.656			0.311688
										62.667			0.19038				68.184			0.213292
																	54.928			0.36624
																	48.718			0.437891
																	44.694			0.48432
																	47.246			0.454875
Subject 7
	L		VR_max			Velocity Loss(%)		M		VR_max			Velocity Loss(%)		H		VR_max			Velocity Loss(%)
			51.723			0.0877939				80.747			0				60.583			0
			56.701			0				65.969			0.183016				53.294			0.120314
			55.909			0.013968				59.471			0.26349				57.551			0.050047
										69.828			0.135225				53.264			0.120809
										78.75			0.0247316				56.038			0.075021
										67.078			0.169282				49.651			0.180447
																	42.967			0.290775
																	48.277			0.203126
																	49.218			0.187594
Subject 8	L		VR_max			Velocity Loss(%)		M		VR_max			Velocity Loss(%)		H		VR_max			Velocity Loss(%)
			69.445			0.0814882				62.384			0.0805601				88.548			0
			75.606			0				67.85			0				82.872			0.0641008
			62.156			0.177896				60.663			0.105925				74.285			0.161076
										64.525			0.0490052				62.484			0.294349
										57.314			0.155284				76.639			0.134492
										53.977			0.204466				63.117			0.2872
																	62.846			0.290261
																	66.8			0.245607
																	67.835			0.233918
Subject 9	L		VR_max			Velocity Loss(%)		M		VR_max			Velocity Loss(%)		H		VR_max			Velocity Loss(%)
			57.169			0.142714				73.085			0				75.016			0.0098989
			66.686			0				58.713			0.196648				75.766			0
			64.732			0.0293015				65.652			0.101703				70.135			0.0743209
										57.721			0.210221				65.966			0.129346
										50.747			0.305644				67.707			0.106367
										49.889			0.317384				57.338			0.243223
																	65.069			0.141185
																	57.524			0.240768
																	52.448			0.307763
Subject 10	L		VR_max			Velocity Loss(%)		M		VR_max			Velocity Loss(%)		H		VR_max			Velocity Loss(%)
			85.893			0.144364				75.594			0.0389046				73.239			0.0875237
			91.318			0.0903223				72.567			0.0773896				79.548			0.00892056
			100.385			0				78.654			0				80.264			0
			82.397			0.17919				63.587			0.191561				76.519			0.0466585
										67.416			0.142879				64.826			0.19234
										59.998			0.237191				72.234			0.100045
										53.73			0.316882				75.122			0.0640636
																	64.106			0.201311
																	69.656			0.132164
																	77.2			0.038174
																	64.392			0.197747
Subject 11	L		VR_max			Velocity Loss(%)		M		VR_max			Velocity Loss(%)		H		VR_max			Velocity Loss(%)
			59.342			0.0171748				59.349			0.0809861				57.61			0.156058
			58.508			0.0309876				64.579			0				60.73			0.110353
			54.99			0.0892529				58.251			0.0979885				66.78			0.0217248
			60.379			0				61.64			0.0455102				68.263			0
										49.219			0.237848				57.001			0.16498
										61.518			0.0473993				53.431			0.217277
										49.364			0.235603				45.106			0.339232
										46.88			0.274067				44.363			0.350116
																	42.235			0.38129
																	45.606			0.331907
																	49.253			0.278482
																	42.487			0.377598
																	43.072			0.369029
Subject 12	L		VR_max			Velocity Loss(%)		M		VR_max			Velocity Loss(%)		H		VR_max			Velocity Loss(%)
			66.151			0.0201739				58.542			0				72.336			0.0444007
			61.671			0.0865315				55.867			0.0456937				72.449			0.0429079
			59.516			0.118451				56.991			0.0264938				69.208			0.0857233
			53.204			0.211944				46.343			0.20838				66.791			0.117653
			67.513			0				56.555			0.0339414				57.425			0.241383
										56.057			0.0424482				59.553			0.213271
										54.694			0.0657306				56.756			0.250221
										41.989			0.282754				59.707			0.211237
										45.598			0.221106				67.856			0.103584
										54.707			0.0655085				57.111			0.245532
																	50.161			0.337345
																	52.769			0.302892
																	75.697			0
																	56.744			0.25038
Subject 13	L		VR_max			Velocity Loss(%)		M		VR_max			Velocity Loss(%)		H		VR_max			Velocity Loss(%)
			59.935			0.0124565				65.776			0.166083				67.744			0.00789362
			54.983			0.0940502				78.876			0				66.176			0.0308569
			60.691			0				68.417			0.132601				59.232			0.132551
										70.475			0.106509				68.283			0
										67.174			0.148359				62.011			0.091853
																	59.415			0.129871
																	60.141			0.119239
																	55.742			0.183662
Subject 14	L		VR_max			Velocity Loss(%)		M		VR_max			Velocity Loss(%)		H		VR_max			Velocity Loss(%)
			89.615			0				86.458			0.0575552				114.608			0
			86.52			0.0345366				91.738			0				93.466			0.184472
			87.615			0.0223177				75.423			0.177843				102.307			0.107331
			76.685			0.144284				85.311			0.0700582				96.811			0.155286
										87.656			0.0444963				93.085			0.187797
										85.841			0.0642809				105.81			0.076766
										80.309			0.124583				105.737			0.077403
										75.786			0.173887				87.972			0.23241
																	81.412			0.289648
																	89.849			0.216032
																	79.918			0.302684
																	74.866			0.346765
Subject 15	L		VR_max			Velocity Loss(%)		M		VR_max			Velocity Loss(%)		H		VR_max			Velocity Loss(%)
			89.165			0.157414				108.677			0				114.061			0
			105.823			0				83.933			0.227684				91.66			0.196395
			70.863			0.330363				77.744			0.284632				84.937			0.255337
			84.485			0.201639				86.371			0.20525				74.051			0.350777
										87.618			0.193776				67.625			0.407115
										73.398			0.324623				73.167			0.358527
										71.78			0.339511				72.136			0.367566
										72.928			0.328947				90.681			0.204978
																	75.744			0.335934
																	57.322			0.497444
																	53.797			0.528349
Subject 16	L		VR_max			Velocity Loss(%)		M		VR_max			Velocity Loss(%)		H		VR_max			Velocity Loss(%)
			66.036			0.189653				79.368			0				79.458			0.092593
			62.017			0.238971				76.489			0.0362741				82.854			0.0538108
			81.491			0				61.083			0.230383				80.822			0.0770162
			81.216			0.00337461				68.457			0.137474				87.566			0
										73.35			0.075824				78.872			0.0992851
										53.532			0.325522				64.065			0.26838
										48.047			0.39463				70.66			0.193066
																	66.917			0.235811
																	62.365			0.287794
																	68.827			0.213999
																	53.695			0.386805
